# Supplementary material
Source: PubMed Central journal article supplement (PMC2680277)
Supplement: NIHMS82732-supplement-Suppl__Fig__8.pdf [file NIHMS82732-supplement-Suppl__Fig__8.pdf]

## Script File

**.\Global analysis peptides\Scripts\script file  
Capeakbrini4bSRPMfitmodsuppsi5.txt**

---

[task]

task = fit  
data = progress

[mechanism]

A + B <====> AB : k01 kr01  
Cas + AB ----> Cai + B : k1  
Cae + C + Cai ----> Cai + Cai + C: k2  
Cai + P <====> CaiP : k3 k3r  
CaiP ----> Cae + P : k4  
Cai + CaM + Cai <====> CaiCaMh : k5 k5r  
CaiCaMh + Cai + Cai <==> CaiCaM : k25 k25r  
P + CaiCaM <====> PCaiCaM : k6 k6r  
PCaiCaM + Cai <====> PCaiCaMCai : k7 k7r  
PCaiCaMCai ----> PCaiCaM + Cae : k8  
PCaiCaM <==> PCaM + Cai + Cai + Cai + Cai : k9 k9r  
PCaM ----> P + CaM : k10  
  
Cai + S <====> CaiS : k07 k07r  
CaiS <====> Cas + S : k08 k08r

[constants]

k01 = 10?  
kr01 = 15?  
k1 = .005?  
k2 = 1.4?  
k3 = 10  
k3r = 50  
k4 = 5.5  
k5 = 9?  
k5r = 2?  
k25 = 70?  
k25r = 2?  
k6 = .2  
k6r = 0.0008  
k7 = 50  
k7r = 10  
k8 = 30  
k9 = 10  
k9r = .0005?  
k10 = .033  
  
k07 = 140  
k07r = 20  
k08 = 70  
k08r = .2?

[concentrations]

```
A = 10
B = .2?
C = 1?
Cae = 10000?
```

```
CaiP = 0
CaM = 2?
CaiCaM = 0
PCaiCaM = 0
PCaiCaMCai = 0
S = 0.003?
CaiS = 0
Cas = 2000?
```

```
[responses]
```

```
Cae = 0
Cai = 1
B = 0
CaB = 0
P = 0
CaiP = 0
CaM = 0
CaiCaM = 0
PCaiCaM = 0
PCaiCaMCai = 0
```

```
[progress]
```

```
directory ./global analysis peptides/
```

```
file controldatabrini.txt
concentration P = 0.03?
concentration Cai = 0.001?
```

```
file 4bdatabrini.txt
concentration P = 0.3?
concentration Cai = 0.1?
```

```
[output]
```

```
directory ./global/brini4b
[settings]
<constrains>
ConcError = 20.0
```

```
[end]
```

---

## Script File

.\**Global analysis peptides**\Scripts\script file  
Capeakbrini4aSRPMfitv2.txt

---

[task]

task = fit  
data = progress

[mechanism]

A + B <====> AB : k01 kr01  
Cas + AB ----> Cai + B : k1  
Cae + C + Cai ----> Cai + Cai + C: k2  
Cai + P <====> CaiP : k3 k3r  
CaiP ----> Cae + P : k4  
Cai + CaM + Cai <====> CaiCaMh : k5 k5r  
CaiCaMh + Cai + Cai <====> CaiCaM : k25 k25r  
P + CaiCaM <====> PCaiCaM : k6 k6r  
PCaiCaM + Cai <====> PCaiCaMCai : k7 k7r  
PCaiCaMCai ----> PCaiCaM + Cae : k8  
PCaiCaM <====> PCaM + Cai + Cai + Cai + Cai : k9 k9r  
PCaM ----> P + CaM : k10  
  
Cai + S <====> CaiS : k07 k07r  
CaiS <====> Cas + S : k08 k08r

[constants]

k01 = 9.3  
kr01 = 17  
k1 = .0047  
k2 = .6615  
k3 = 10  
k3r = 50  
k4 = 12  
k5 = 2.669  
k5r = 2.682  
k25 = 170  
k25r = 1.5  
k6 = .8  
k6r = 0.02  
k7 = 50  
k7r = 10  
k8 = 30  
k9 = 10?  
k9r = .05?  
k10 = .06  
  
k07 = 140  
k07r = 20  
k08 = 70  
k08r = .266?

[concentrations]

```
A = 10
B = .2?
C = 1?
Cae = 10000?
```

```
CaiP = 0
CaM = 2
CaiCaM = 0
PCaiCaM = 0
PCaICaMCai = 0
S = 0.003?
CaiS = 0
Cas = 2000?
```

```
[responses]
```

```
  Cae = 0
  Cai = 1
  B = 0
  CaB = 0
  P = 0
  CaiP = 0
  CaM = 0
  CaiCaM = 0
  PCaiCaM = 0
  PCaICaMCai = 0
```

```
[progress]
```

```
directory ../global analysis peptides/
```

```
file 4adatabrini.txt
concentration P = 0.3?
concentration Cai = 0.1?
```

```
[output]
```

```
directory ../global/brini4a2
[settings]
<constrains>
ConcError = 20.0
```

```
[end]
```

---

|       |        |
|-------|--------|
| 3.258 | 0.3762 |
| 3.328 | 0.3762 |
| 3.397 | 0.4435 |
| 3.466 | 0.4435 |
| 3.536 | 0.4771 |
| 3.605 | 0.4771 |
| 3.675 | 0.4771 |
| 3.744 | 0.4856 |
| 3.814 | 0.4856 |
| 3.883 | 0.5276 |
| 3.953 | 0.5276 |
| 4.000 | 0.5968 |
| 4.022 | 0.5276 |
| 4.091 | 0.6537 |
| 4.161 | 0.6537 |
| 4.230 | 0.6537 |
| 4.300 | 0.7462 |
| 4.369 | 0.7462 |
| 4.439 | 0.7547 |
| 4.508 | 0.7547 |
| 4.578 | 0.7547 |
| 4.647 | 0.7547 |
| 4.716 | 0.7547 |
| 4.786 | 0.8388 |
| 4.855 | 0.8388 |
| 4.925 | 0.8388 |
| 4.933 | 0.9274 |
| 4.994 | 0.9901 |
| 5.064 | 0.9901 |
| 5.133 | 0.9901 |
| 5.202 | 1.0410 |
| 5.272 | 1.0410 |
| 5.341 | 1.0660 |
| 5.411 | 1.0660 |
| 5.480 | 1.0660 |
| 5.550 | 1.1080 |
| 5.619 | 1.1080 |
| 5.667 | 1.1850 |
| 5.689 | 1.2420 |
| 5.758 | 1.2420 |
| 5.800 | 1.3390 |
| 5.827 | 1.2420 |
| 5.897 | 1.4110 |
| 5.966 | 1.4110 |
| 6.036 | 1.4110 |
| 6.105 | 1.4530 |
| 6.175 | 1.4530 |
| 6.244 | 1.4610 |
| 6.267 | 1.6690 |
| 6.314 | 1.4610 |
| 6.383 | 1.4610 |
| 6.400 | 1.6050 |
| 6.452 | 1.5450 |
| 6.522 | 1.5450 |
| 6.591 | 1.5450 |
| 6.661 | 1.7220 |
| 6.730 | 1.7220 |
| 6.800 | 1.8230 |
| 6.869 | 1.8230 |
| 6.939 | 1.8230 |

|        |        |
|--------|--------|
| 7.008  | 1.8480 |
| 7.077  | 1.8480 |
| 7.147  | 1.8820 |
| 7.216  | 1.8820 |
| 7.286  | 1.8820 |
| 7.355  | 1.9820 |
| 7.400  | 2.0650 |
| 7.425  | 1.9820 |
| 7.494  | 1.9820 |
| 7.563  | 2.5540 |
| 7.563  | 2.1420 |
| 7.633  | 2.5540 |
| 7.633  | 2.1420 |
| 7.702  | 2.1930 |
| 7.772  | 2.1930 |
| 7.800  | 2.3790 |
| 7.800  | 2.2900 |
| 7.841  | 2.1930 |
| 7.867  | 2.4600 |
| 7.911  | 2.1930 |
| 7.933  | 2.5080 |
| 7.980  | 2.1930 |
| 8.050  | 2.2180 |
| 8.067  | 2.5560 |
| 8.119  | 2.2180 |
| 8.188  | 2.2180 |
| 8.258  | 2.6130 |
| 8.258  | 2.2940 |
| 8.327  | 2.6130 |
| 8.397  | 2.6130 |
| 8.466  | 2.7060 |
| 8.536  | 2.7060 |
| 8.605  | 2.6970 |
| 8.675  | 2.6970 |
| 8.744  | 2.6970 |
| 8.813  | 2.7140 |
| 8.883  | 2.7140 |
| 8.952  | 2.7650 |
| 9.022  | 2.7650 |
| 9.091  | 2.7650 |
| 9.161  | 2.8400 |
| 9.230  | 2.8400 |
| 9.300  | 2.8400 |
| 9.369  | 2.8570 |
| 9.438  | 2.8570 |
| 9.508  | 2.8650 |
| 9.577  | 2.8650 |
| 9.647  | 2.8650 |
| 9.716  | 2.8820 |
| 9.786  | 2.8820 |
| 9.855  | 2.8820 |
| 9.924  | 2.9160 |
| 9.994  | 2.9160 |
| 10.060 | 2.9580 |
| 10.130 | 2.9580 |
| 10.200 | 2.9580 |
| 10.270 | 2.9660 |
| 10.340 | 2.9660 |
| 10.410 | 2.9750 |
| 10.480 | 2.9750 |

|        |        |
|--------|--------|
| 10.550 | 2.9750 |
| 10.620 | 2.9920 |
| 10.690 | 2.9920 |
| 10.760 | 2.9920 |
| 10.830 | 3.0340 |
| 10.900 | 3.0340 |
| 10.970 | 3.0590 |
| 11.040 | 3.0590 |
| 11.110 | 3.0590 |
| 11.170 | 3.0590 |
| 11.240 | 3.0590 |
| 11.310 | 3.0670 |
| 11.380 | 3.0670 |
| 11.450 | 3.0670 |
| 11.520 | 3.0760 |
| 11.590 | 3.0760 |
| 11.660 | 3.0760 |
| 11.730 | 3.1180 |
| 11.800 | 3.1180 |
| 11.870 | 3.1260 |
| 11.940 | 3.1260 |
| 12.010 | 3.1260 |
| 12.080 | 3.1260 |
| 12.150 | 3.1260 |
| 12.220 | 3.1260 |
| 12.290 | 3.1260 |
| 12.350 | 3.1260 |
| 12.420 | 3.1510 |
| 12.490 | 3.1510 |
| 12.560 | 3.1510 |
| 12.630 | 3.1600 |
| 12.700 | 3.1600 |
| 12.770 | 3.1680 |
| 12.840 | 3.1680 |
| 12.910 | 3.1680 |
| 12.980 | 3.1680 |
| 13.050 | 3.1680 |
| 13.120 | 3.1680 |
| 13.190 | 3.1680 |
| 13.260 | 3.1680 |
| 13.330 | 3.1680 |
| 13.400 | 3.1680 |
| 13.470 | 3.1680 |
| 13.540 | 3.1680 |
| 13.600 | 3.1680 |
| 13.670 | 3.1680 |
| 13.740 | 3.1680 |
| 13.810 | 3.1680 |
| 13.880 | 3.1680 |
| 13.950 | 3.1680 |
| 14.020 | 3.1680 |
| 14.090 | 3.1600 |
| 14.160 | 3.1600 |
| 14.230 | 3.1350 |
| 14.300 | 3.1350 |
| 14.370 | 3.1350 |
| 14.440 | 3.1260 |
| 14.510 | 3.1260 |
| 14.580 | 3.1260 |
| 14.650 | 3.1260 |

|        |        |
|--------|--------|
| 14.720 | 3.1260 |
| 14.790 | 3.1260 |
| 14.850 | 3.1260 |
| 14.920 | 3.1260 |
| 14.990 | 3.1010 |
| 15.060 | 3.1010 |
| 15.130 | 3.0840 |
| 15.200 | 3.0840 |
| 15.270 | 3.0840 |
| 15.340 | 3.0670 |
| 15.410 | 3.0670 |
| 15.480 | 3.0670 |
| 15.550 | 3.0670 |
| 15.620 | 3.0670 |
| 15.690 | 3.0590 |
| 15.760 | 3.0590 |
| 15.830 | 3.0590 |
| 15.900 | 3.0340 |
| 15.970 | 3.0340 |
| 16.040 | 3.0170 |
| 16.100 | 3.0170 |
| 16.170 | 3.0170 |
| 16.240 | 3.0080 |
| 16.310 | 3.0080 |
| 16.380 | 3.0080 |
| 16.450 | 3.0080 |
| 16.520 | 3.0080 |
| 16.590 | 2.9750 |
| 16.660 | 2.9750 |
| 16.730 | 2.9750 |
| 16.800 | 2.9500 |
| 16.870 | 2.9500 |
| 16.940 | 2.9500 |
| 17.010 | 2.9500 |
| 17.080 | 2.9500 |
| 17.150 | 2.9410 |
| 17.220 | 2.9410 |
| 17.290 | 2.9410 |
| 17.350 | 2.9330 |
| 17.420 | 2.9330 |
| 17.490 | 2.8990 |
| 17.560 | 2.8990 |
| 17.630 | 2.8990 |
| 17.700 | 2.8820 |
| 17.770 | 2.8820 |
| 17.840 | 2.8820 |
| 17.910 | 2.8820 |
| 17.980 | 2.8820 |
| 18.050 | 2.8740 |
| 18.120 | 2.8740 |
| 18.190 | 2.8740 |
| 18.260 | 2.8650 |
| 18.330 | 2.8650 |
| 18.400 | 2.8320 |
| 18.470 | 2.8320 |
| 18.540 | 2.8320 |
| 18.600 | 2.8150 |
| 18.670 | 2.8150 |
| 18.740 | 2.8150 |
| 18.810 | 2.8150 |



|        |        |
|--------|--------|
| 18.880 | 2.8150 |
| 18.950 | 2.8070 |
| 19.020 | 2.8070 |
| 19.090 | 2.8070 |
| 19.160 | 2.7810 |
| 19.230 | 2.7810 |
| 19.300 | 2.7560 |
| 19.370 | 2.7560 |
| 19.440 | 2.7560 |
| 19.510 | 2.7480 |
| 19.580 | 2.7480 |
| 19.650 | 2.7480 |
| 19.720 | 2.7390 |
| 19.790 | 2.7390 |
| 19.850 | 2.7310 |
| 19.920 | 2.7310 |
| 19.990 | 2.7310 |
| 20.060 | 2.7140 |
| 20.130 | 2.7140 |
| 20.200 | 2.6970 |
| 20.270 | 2.6970 |
| 20.340 | 2.6970 |
| 20.410 | 2.6970 |
| 20.480 | 2.6970 |
| 20.550 | 2.6970 |
| 20.620 | 2.6800 |
| 20.690 | 2.6800 |
| 20.760 | 2.6640 |
| 20.830 | 2.6640 |
| 20.900 | 2.6640 |
| 20.970 | 2.6470 |
| 21.040 | 2.6470 |
| 21.100 | 2.6380 |
| 21.170 | 2.6380 |
| 21.240 | 2.6380 |
| 21.310 | 2.6380 |
| 21.380 | 2.6380 |
| 21.450 | 2.6380 |
| 21.520 | 2.6300 |
| 21.590 | 2.6300 |
| 21.660 | 2.6050 |
| 21.730 | 2.6050 |
| 21.800 | 2.6050 |
| 21.870 | 2.5880 |
| 21.940 | 2.5880 |
| 22.010 | 2.5880 |
| 22.080 | 2.5880 |
| 22.150 | 2.5880 |
| 22.220 | 2.5880 |
| 22.290 | 2.5880 |
| 22.350 | 2.5880 |
| 22.420 | 2.5800 |
| 22.490 | 2.5800 |
| 22.560 | 2.5630 |
| 22.630 | 2.5630 |
| 22.700 | 2.5630 |
| 22.770 | 2.5460 |
| 22.840 | 2.5460 |
| 22.910 | 2.5460 |
| 22.980 | 2.5460 |

|        |        |
|--------|--------|
| 23.050 | 2.5460 |
| 23.120 | 2.5460 |
| 23.190 | 2.5460 |
| 23.260 | 2.5460 |
| 23.330 | 2.5290 |
| 23.400 | 2.5290 |
| 23.470 | 2.5040 |
| 23.540 | 2.5040 |
| 23.600 | 2.5040 |
| 23.670 | 2.4950 |
| 23.740 | 2.4950 |
| 23.810 | 2.4950 |
| 23.880 | 2.4950 |
| 23.950 | 2.4950 |
| 24.020 | 2.4870 |
| 24.090 | 2.4870 |
| 24.160 | 2.4870 |
| 24.230 | 2.4620 |
| 24.300 | 2.4620 |
| 24.370 | 2.4450 |
| 24.440 | 2.4450 |
| 24.510 | 2.4450 |
| 24.580 | 2.4450 |
| 24.650 | 2.4450 |
| 24.720 | 2.4450 |
| 24.780 | 2.4370 |
| 24.850 | 2.4370 |
| 24.920 | 2.4280 |
| 24.990 | 2.4280 |
| 25.060 | 2.4280 |
| 25.130 | 2.4110 |
| 25.200 | 2.4110 |
| 25.270 | 2.4030 |
| 25.340 | 2.4030 |
| 25.410 | 2.4030 |
| 25.480 | 2.4030 |
| 25.550 | 2.4030 |
| 25.620 | 2.4030 |
| 25.690 | 2.4030 |
| 25.760 | 2.4030 |
| 25.830 | 2.3860 |
| 25.900 | 2.3860 |
| 25.970 | 2.3860 |
| 26.030 | 2.3690 |
| 26.100 | 2.3690 |
| 26.170 | 2.3690 |
| 26.240 | 2.3610 |
| 26.310 | 2.3610 |
| 26.380 | 2.3610 |
| 26.450 | 2.3610 |
| 26.520 | 2.3610 |
| 26.590 | 2.3520 |
| 26.660 | 2.3520 |
| 26.730 | 2.3270 |
| 26.800 | 2.3270 |
| 26.870 | 2.3270 |
| 26.940 | 2.3270 |
| 27.010 | 2.3270 |
| 27.080 | 2.3270 |
| 27.150 | 2.3270 |

|        |        |
|--------|--------|
| 27.220 | 2.3270 |
| 27.280 | 2.3190 |
| 27.350 | 2.3190 |
| 27.420 | 2.3190 |
| 27.490 | 2.3020 |
| 27.560 | 2.3020 |
| 27.630 | 2.2940 |
| 27.700 | 2.2940 |
| 27.770 | 2.2940 |
| 27.840 | 2.2850 |
| 27.910 | 2.2850 |
| 27.980 | 2.2850 |
| 28.050 | 2.2850 |
| 28.120 | 2.2850 |
| 28.190 | 2.2770 |
| 28.260 | 2.2770 |
| 28.330 | 2.2770 |
| 28.400 | 2.2600 |
| 28.470 | 2.2600 |
| 28.530 | 2.2520 |
| 28.600 | 2.2520 |
| 28.670 | 2.2520 |
| 28.740 | 2.2520 |
| 28.810 | 2.2520 |
| 28.880 | 2.2520 |
| 28.950 | 2.2520 |
| 29.020 | 2.2520 |
| 29.090 | 2.2430 |
| 29.160 | 2.2430 |
| 29.230 | 2.2430 |
| 29.300 | 2.2260 |
| 29.370 | 2.2260 |
| 29.440 | 2.2260 |
| 29.510 | 2.2180 |
| 29.580 | 2.2180 |
| 29.650 | 2.2180 |
| 29.720 | 2.2180 |
| 29.780 | 2.2180 |
| 29.850 | 2.2100 |
| 29.920 | 2.2100 |
| 29.990 | 2.2010 |
| 30.060 | 2.2010 |
| 30.130 | 2.2010 |
| 30.200 | 2.1840 |
| 30.270 | 2.1840 |
| 30.340 | 2.1840 |
| 30.410 | 2.1840 |
| 30.480 | 2.1840 |
| 30.550 | 2.1840 |
| 30.620 | 2.1840 |
| 30.690 | 2.1840 |
| 30.760 | 2.1760 |
| 30.830 | 2.1760 |
| 30.900 | 2.1670 |
| 30.970 | 2.1670 |
| 31.030 | 2.1670 |
| 31.100 | 2.1590 |
| 31.170 | 2.1590 |
| 31.240 | 2.1590 |
| 31.310 | 2.1590 |

|        |        |
|--------|--------|
| 31.380 | 2.1590 |
| 31.450 | 2.1510 |
| 31.520 | 2.1510 |
| 31.590 | 2.1510 |
| 31.660 | 2.1420 |
| 31.730 | 2.1420 |
| 31.800 | 2.1420 |
| 31.870 | 2.1420 |
| 31.940 | 2.1420 |
| 32.010 | 2.1340 |
| 32.080 | 2.1340 |
| 32.150 | 2.1340 |
| 32.220 | 2.1340 |
| 32.280 | 2.1340 |
| 32.350 | 2.1340 |
| 32.420 | 2.1340 |
| 32.490 | 2.1340 |
| 32.560 | 2.1250 |
| 32.630 | 2.1250 |
| 32.700 | 2.1250 |
| 32.770 | 2.1170 |
| 32.840 | 2.1170 |
| 32.910 | 2.1170 |
| 32.980 | 2.1170 |
| 33.050 | 2.1170 |
| 33.120 | 2.1090 |
| 33.190 | 2.1090 |
| 33.260 | 2.1090 |
| 33.330 | 2.1090 |
| 33.400 | 2.1090 |
| 33.470 | 2.1000 |
| 33.530 | 2.1000 |
| 33.600 | 2.1000 |
| 33.670 | 2.0920 |
| 33.740 | 2.0920 |
| 33.810 | 2.0920 |
| 33.880 | 2.0920 |
| 33.950 | 2.0920 |
| 34.020 | 2.0830 |
| 34.090 | 2.0830 |
| 34.160 | 2.0670 |
| 34.230 | 2.0670 |
| 34.300 | 2.0670 |
| 34.370 | 2.0580 |
| 34.440 | 2.0580 |
| 34.510 | 2.0580 |
| 34.580 | 2.0500 |
| 34.650 | 2.0500 |
| 34.720 | 2.0500 |
| 34.780 | 2.0500 |
| 34.850 | 2.0500 |
| 34.920 | 2.0410 |
| 34.990 | 2.0410 |
| 35.060 | 2.0410 |
| 35.130 | 2.0240 |
| 35.200 | 2.0240 |
| 35.270 | 2.0160 |
| 35.340 | 2.0160 |
| 35.410 | 2.0160 |
| 35.480 | 2.0160 |

|        |        |
|--------|--------|
| 35.550 | 2.0160 |
| 35.620 | 2.0160 |
| 35.690 | 2.0160 |
| 35.760 | 2.0160 |
| 35.830 | 2.0160 |
| 35.900 | 2.0160 |
| 35.970 | 2.0160 |
| 36.030 | 2.0160 |
| 36.100 | 2.0160 |
| 36.170 | 2.0080 |
| 36.240 | 2.0080 |
| 36.310 | 2.0080 |
| 36.380 | 2.0080 |
| 36.450 | 2.0080 |
| 36.520 | 2.0080 |
| 36.590 | 2.0080 |
| 36.660 | 2.0080 |
| 36.730 | 1.9990 |
| 36.800 | 1.9990 |
| 36.870 | 1.9990 |
| 36.940 | 1.9820 |
| 37.010 | 1.9820 |
| 37.080 | 1.9820 |
| 37.150 | 1.9820 |
| 37.210 | 1.9820 |
| 37.280 | 1.9820 |
| 37.350 | 1.9820 |
| 37.420 | 1.9740 |
| 37.490 | 1.9740 |
| 37.560 | 1.9740 |
| 37.630 | 1.9570 |
| 37.700 | 1.9570 |
| 37.770 | 1.9570 |
| 37.840 | 1.9490 |
| 37.910 | 1.9490 |
| 37.980 | 1.9490 |
| 38.050 | 1.9490 |
| 38.120 | 1.9490 |
| 38.190 | 1.9400 |
| 38.260 | 1.9400 |
| 38.330 | 1.9400 |
| 38.400 | 1.9320 |
| 38.460 | 1.9320 |
| 38.530 | 1.9320 |
| 38.600 | 1.9320 |
| 38.670 | 1.9320 |
| 38.740 | 1.9320 |
| 38.810 | 1.9320 |
| 38.880 | 1.9320 |
| 38.950 | 1.9320 |
| 39.020 | 1.9320 |
| 39.090 | 1.9150 |
| 39.160 | 1.9150 |
| 39.230 | 1.9150 |
| 39.300 | 1.9150 |
| 39.370 | 1.9150 |
| 39.440 | 1.9070 |
| 39.510 | 1.9070 |
| 39.580 | 1.9070 |
| 39.650 | 1.9070 |

|        |        |
|--------|--------|
| 39.710 | 1.9070 |
| 39.780 | 1.8980 |
| 39.850 | 1.8980 |
| 39.920 | 1.8980 |
| 39.990 | 1.8980 |
| 40.060 | 1.8980 |
| 40.130 | 1.8980 |
| 40.200 | 1.8820 |
| 40.270 | 1.8820 |
| 40.340 | 1.8820 |
| 40.410 | 1.8820 |
| 40.480 | 1.8820 |
| 40.550 | 1.8820 |
| 40.620 | 1.8820 |
| 40.690 | 1.8820 |
| 40.760 | 1.8820 |
| 40.830 | 1.8820 |
| 40.900 | 1.8730 |
| 40.960 | 1.8730 |
| 41.030 | 1.8730 |
| 41.100 | 1.8650 |
| 41.170 | 1.8650 |
| 41.240 | 1.8560 |
| 41.310 | 1.8560 |
| 41.380 | 1.8560 |
| 41.450 | 1.8560 |
| 41.520 | 1.8560 |
| 41.590 | 1.8560 |
| 41.660 | 1.8560 |
| 41.730 | 1.8560 |
| 41.800 | 1.8390 |
| 41.870 | 1.8390 |
| 41.940 | 1.8390 |
| 42.010 | 1.8390 |
| 42.080 | 1.8390 |
| 42.150 | 1.8390 |
| 42.210 | 1.8390 |
| 42.280 | 1.8390 |
| 42.350 | 1.8310 |
| 42.420 | 1.8310 |
| 42.490 | 1.8310 |
| 42.560 | 1.8230 |
| 42.630 | 1.8230 |
| 42.700 | 1.8140 |
| 42.770 | 1.8140 |
| 42.840 | 1.8140 |
| 42.910 | 1.8140 |
| 42.980 | 1.8140 |
| 43.050 | 1.8140 |
| 43.120 | 1.8140 |
| 43.190 | 1.8140 |
| 43.260 | 1.8060 |
| 43.330 | 1.8060 |
| 43.400 | 1.8060 |
| 43.460 | 1.8060 |
| 43.530 | 1.8060 |
| 43.600 | 1.7970 |
| 43.670 | 1.7970 |
| 43.740 | 1.7970 |
| 43.810 | 1.7970 |

|        |        |
|--------|--------|
| 43.880 | 1.7970 |
| 43.950 | 1.7970 |
| 44.020 | 1.7970 |
| 44.090 | 1.7970 |
| 44.160 | 1.7970 |
| 44.230 | 1.7970 |
| 44.300 | 1.7970 |
| 44.370 | 1.7970 |
| 44.440 | 1.7970 |
| 44.510 | 1.7890 |
| 44.580 | 1.7890 |
| 44.650 | 1.7890 |
| 44.710 | 1.7890 |
| 44.780 | 1.7890 |
| 44.850 | 1.7890 |
| 44.920 | 1.7890 |
| 44.990 | 1.7890 |
| 45.060 | 1.7890 |
| 45.130 | 1.7890 |
| 45.200 | 1.7890 |
| 45.270 | 1.7810 |
| 45.340 | 1.7810 |
| 45.410 | 1.7810 |
| 45.480 | 1.7810 |
| 45.550 | 1.7810 |
| 45.620 | 1.7810 |
| 45.690 | 1.7810 |
| 45.760 | 1.7810 |
| 45.830 | 1.7720 |
| 45.900 | 1.7720 |
| 45.960 | 1.7720 |
| 46.030 | 1.7720 |
| 46.100 | 1.7720 |
| 46.170 | 1.7550 |
| 46.240 | 1.7550 |
| 46.310 | 1.7550 |
| 46.380 | 1.7550 |
| 46.450 | 1.7550 |
| 46.520 | 1.7550 |
| 46.590 | 1.7550 |
| 46.660 | 1.7550 |
| 46.730 | 1.7470 |
| 46.800 | 1.7470 |
| 46.870 | 1.7390 |
| 46.940 | 1.7390 |
| 47.010 | 1.7390 |
| 47.080 | 1.7390 |
| 47.150 | 1.7390 |
| 47.210 | 1.7390 |
| 47.280 | 1.7390 |
| 47.350 | 1.7390 |
| 47.420 | 1.7300 |
| 47.490 | 1.7300 |
| 47.560 | 1.7300 |
| 47.630 | 1.7300 |
| 47.700 | 1.7300 |
| 47.770 | 1.7050 |
| 47.840 | 1.7050 |
| 47.910 | 1.7050 |
| 47.980 | 1.7050 |

|        |        |
|--------|--------|
| 48.050 | 1.7050 |
| 48.120 | 1.7050 |
| 48.190 | 1.7050 |
| 48.260 | 1.7050 |
| 48.330 | 1.7050 |
| 48.400 | 1.7050 |
| 48.460 | 1.7050 |
| 48.530 | 1.6970 |
| 48.600 | 1.6970 |
| 48.670 | 1.6800 |
| 48.740 | 1.6800 |
| 48.810 | 1.6800 |
| 48.880 | 1.6800 |
| 48.950 | 1.6800 |
| 49.020 | 1.6800 |
| 49.090 | 1.6800 |
| 49.160 | 1.6800 |
| 49.230 | 1.6710 |
| 49.300 | 1.6710 |
| 49.370 | 1.6710 |
| 49.440 | 1.6630 |
| 49.510 | 1.6630 |
| 49.580 | 1.6630 |
| 49.640 | 1.6630 |
| 49.710 | 1.6630 |
| 49.780 | 1.6630 |
| 49.850 | 1.6630 |
| 49.920 | 1.6630 |
| 49.990 | 1.6630 |
| 50.060 | 1.6630 |
| 50.130 | 1.6540 |
| 50.200 | 1.6540 |
| 50.270 | 1.6540 |
| 50.340 | 1.6540 |
| 50.410 | 1.6540 |
| 50.480 | 1.6540 |
| 50.550 | 1.6540 |
| 50.620 | 1.6540 |
| 50.690 | 1.6540 |
| 50.760 | 1.6540 |
| 50.830 | 1.6540 |
| 50.890 | 1.6540 |
| 50.960 | 1.6540 |
| 51.030 | 1.6460 |
| 51.100 | 1.6460 |
| 51.170 | 1.6460 |
| 51.240 | 1.6380 |
| 51.310 | 1.6380 |
| 51.380 | 1.6380 |
| 51.450 | 1.6380 |
| 51.520 | 1.6380 |
| 51.590 | 1.6380 |
| 51.660 | 1.6380 |
| 51.730 | 1.6380 |
| 51.800 | 1.6290 |
| 51.870 | 1.6290 |
| 51.940 | 1.6210 |
| 52.010 | 1.6210 |
| 52.080 | 1.6210 |
| 52.140 | 1.6210 |



|        |        |
|--------|--------|
| 52.210 | 1.6210 |
| 52.280 | 1.6210 |
| 52.350 | 1.6210 |
| 52.420 | 1.6210 |
| 52.490 | 1.6120 |
| 52.560 | 1.6120 |
| 52.630 | 1.6120 |
| 52.700 | 1.6120 |
| 52.770 | 1.6120 |
| 52.840 | 1.6120 |
| 52.910 | 1.6120 |
| 52.980 | 1.6120 |
| 53.050 | 1.6120 |
| 53.120 | 1.6120 |
| 53.190 | 1.6120 |
| 53.260 | 1.6120 |
| 53.330 | 1.6120 |
| 53.390 | 1.6120 |
| 53.460 | 1.6120 |
| 53.530 | 1.6120 |
| 53.600 | 1.6040 |
| 53.670 | 1.6040 |
| 53.740 | 1.5960 |
| 53.810 | 1.5960 |
| 53.880 | 1.5960 |
| 53.950 | 1.5960 |
| 54.020 | 1.5960 |
| 54.090 | 1.5960 |
| 54.160 | 1.5960 |
| 54.230 | 1.5960 |
| 54.300 | 1.5870 |
| 54.370 | 1.5870 |
| 54.440 | 1.5870 |
| 54.510 | 1.5870 |
| 54.580 | 1.5870 |
| 54.640 | 1.5870 |
| 54.710 | 1.5870 |
| 54.780 | 1.5870 |
| 54.850 | 1.5870 |
| 54.920 | 1.5870 |
| 54.990 | 1.5870 |
| 55.060 | 1.5790 |
| 55.130 | 1.5790 |
| 55.200 | 1.5790 |
| 55.270 | 1.5790 |
| 55.340 | 1.5790 |
| 55.410 | 1.5790 |
| 55.480 | 1.5790 |
| 55.550 | 1.5790 |
| 55.620 | 1.5700 |
| 55.690 | 1.5700 |
| 55.760 | 1.5700 |
| 55.830 | 1.5700 |
| 55.890 | 1.5700 |
| 55.960 | 1.5620 |
| 56.030 | 1.5620 |
| 56.100 | 1.5540 |
| 56.170 | 1.5540 |
| 56.240 | 1.5540 |
| 56.310 | 1.5540 |

|        |        |
|--------|--------|
| 56.380 | 1.5540 |
| 56.450 | 1.5540 |
| 56.520 | 1.5450 |
| 56.590 | 1.5450 |
| 56.660 | 1.5450 |
| 56.730 | 1.5450 |
| 56.800 | 1.5450 |
| 56.870 | 1.5370 |
| 56.940 | 1.5370 |
| 57.010 | 1.5280 |
| 57.080 | 1.5280 |
| 57.140 | 1.5280 |
| 57.210 | 1.5280 |
| 57.280 | 1.5280 |
| 57.350 | 1.5280 |
| 57.420 | 1.5280 |
| 57.490 | 1.5280 |
| 57.560 | 1.5200 |
| 57.630 | 1.5200 |
| 57.700 | 1.5200 |
| 57.770 | 1.5030 |
| 57.840 | 1.5030 |
| 57.910 | 1.5030 |
| 57.980 | 1.5030 |
| 58.050 | 1.5030 |
| 58.120 | 1.5030 |
| 58.190 | 1.5030 |
| 58.260 | 1.5030 |
| 58.330 | 1.5030 |
| 58.390 | 1.5030 |
| 58.460 | 1.4950 |
| 58.530 | 1.4950 |
| 58.600 | 1.4950 |
| 58.670 | 1.4950 |
| 58.740 | 1.4950 |
| 58.810 | 1.4950 |
| 58.880 | 1.4950 |
| 58.950 | 1.4950 |
| 59.020 | 1.4950 |
| 59.090 | 1.4950 |
| 59.160 | 1.4950 |
| 59.230 | 1.4950 |
| 59.300 | 1.4950 |
| 59.370 | 1.4950 |
| 59.440 | 1.4950 |
| 59.510 | 1.4950 |
| 59.580 | 1.4860 |
| 59.640 | 1.4860 |
| 59.710 | 1.4860 |
| 59.780 | 1.4780 |
| 59.850 | 1.4780 |
| 59.920 | 1.4780 |
| 59.990 | 1.4780 |
| 60.060 | 1.4780 |
| 60.130 | 1.4780 |
| 60.200 | 1.4780 |
| 60.270 | 1.4690 |
| 60.340 | 1.4690 |
| 60.410 | 1.4690 |
| 60.480 | 1.4610 |

|        |        |
|--------|--------|
| 60.550 | 1.4610 |
| 60.620 | 1.4610 |
| 60.690 | 1.4610 |
| 60.760 | 1.4610 |
| 60.830 | 1.4610 |
| 60.890 | 1.4610 |
| 60.960 | 1.4610 |
| 61.030 | 1.4440 |
| 61.100 | 1.4440 |
| 61.170 | 1.4440 |
| 61.240 | 1.4360 |
| 61.310 | 1.4360 |
| 61.380 | 1.4360 |
| 61.450 | 1.4360 |
| 61.520 | 1.4360 |
| 61.590 | 1.4360 |
| 61.660 | 1.4360 |
| 61.730 | 1.4270 |
| 61.800 | 1.4270 |

|       |        |
|-------|--------|
| 3.050 | 0.3989 |
| 3.119 | 0.3989 |
| 3.189 | 0.3652 |
| 3.258 | 0.3652 |
| 3.328 | 0.3652 |
| 3.397 | 0.4327 |
| 3.466 | 0.4327 |
| 3.536 | 0.4665 |
| 3.605 | 0.4665 |
| 3.675 | 0.4665 |
| 3.744 | 0.4749 |
| 3.814 | 0.4749 |
| 3.883 | 0.5172 |
| 3.953 | 0.5172 |
| 4.022 | 0.5172 |
| 4.091 | 0.6438 |
| 4.133 | 0.5822 |
| 4.161 | 0.6438 |
| 4.230 | 0.6438 |
| 4.300 | 0.7367 |
| 4.369 | 0.7367 |
| 4.439 | 0.7452 |
| 4.508 | 0.7452 |
| 4.578 | 0.7452 |
| 4.647 | 0.7452 |
| 4.716 | 0.7452 |
| 4.733 | 0.8895 |
| 4.786 | 0.8296 |
| 4.855 | 0.8296 |
| 4.925 | 0.8296 |
| 4.933 | 0.9057 |
| 4.994 | 0.9816 |
| 5.064 | 0.9816 |
| 5.067 | 0.9299 |
| 5.133 | 0.9816 |
| 5.202 | 1.0320 |
| 5.272 | 1.0320 |
| 5.341 | 1.0580 |
| 5.411 | 1.0580 |
| 5.480 | 1.0580 |
| 5.550 | 1.1000 |
| 5.619 | 1.1000 |
| 5.689 | 1.2350 |
| 5.733 | 1.3180 |
| 5.733 | 1.1730 |
| 5.758 | 1.2350 |
| 5.827 | 1.2350 |
| 5.867 | 1.3580 |
| 5.897 | 1.4040 |
| 5.966 | 1.4040 |
| 6.036 | 1.4040 |
| 6.105 | 1.4460 |
| 6.175 | 1.4460 |
| 6.244 | 1.4550 |
| 6.314 | 1.4550 |
| 6.383 | 1.4550 |
| 6.452 | 1.5390 |
| 6.467 | 1.6330 |
| 6.522 | 1.5390 |
| 6.591 | 1.5390 |

|        |        |
|--------|--------|
| 6.600  | 1.6660 |
| 6.661  | 1.7160 |
| 6.730  | 1.7160 |
| 6.733  | 1.6250 |
| 6.800  | 1.8180 |
| 6.869  | 1.8180 |
| 6.939  | 1.8180 |
| 7.008  | 1.8430 |
| 7.077  | 1.8430 |
| 7.147  | 1.8770 |
| 7.216  | 1.8770 |
| 7.286  | 1.8770 |
| 7.355  | 1.9780 |
| 7.425  | 1.9780 |
| 7.467  | 2.0380 |
| 7.494  | 1.9780 |
| 7.563  | 2.1130 |
| 7.633  | 2.1130 |
| 7.702  | 2.1300 |
| 7.733  | 2.1830 |
| 7.772  | 2.1300 |
| 7.841  | 2.1300 |
| 7.867  | 2.2240 |
| 7.911  | 2.1300 |
| 7.933  | 2.2080 |
| 7.980  | 2.1300 |
| 8.050  | 2.1390 |
| 8.067  | 2.2480 |
| 8.119  | 2.1390 |
| 8.188  | 2.1390 |
| 8.258  | 2.2910 |
| 8.327  | 2.2910 |
| 8.397  | 2.2910 |
| 8.466  | 2.3160 |
| 8.536  | 2.3160 |
| 8.605  | 2.3160 |
| 8.675  | 2.3160 |
| 8.744  | 2.3160 |
| 8.813  | 2.3330 |
| 8.883  | 2.3330 |
| 8.952  | 2.3840 |
| 9.022  | 2.3840 |
| 9.091  | 2.3840 |
| 9.161  | 2.4260 |
| 9.230  | 2.4260 |
| 9.300  | 2.4260 |
| 9.369  | 2.4260 |
| 9.438  | 2.4260 |
| 9.508  | 2.4340 |
| 9.577  | 2.4340 |
| 9.647  | 2.4340 |
| 9.716  | 2.4260 |
| 9.786  | 2.4260 |
| 9.855  | 2.4260 |
| 9.924  | 2.4090 |
| 9.994  | 2.4090 |
| 10.060 | 2.3580 |
| 10.130 | 2.3580 |
| 10.200 | 2.3580 |
| 10.270 | 2.3410 |

|        |        |
|--------|--------|
| 10.340 | 2.3410 |
| 10.410 | 2.3330 |
| 10.480 | 2.3330 |
| 10.550 | 2.3330 |
| 10.620 | 2.3080 |
| 10.690 | 2.3080 |
| 10.760 | 2.3080 |
| 10.830 | 2.2400 |
| 10.900 | 2.2400 |
| 10.970 | 2.1810 |
| 11.040 | 2.1810 |
| 11.110 | 2.1810 |
| 11.170 | 2.1810 |
| 11.240 | 2.1810 |
| 11.310 | 2.1720 |
| 11.380 | 2.1720 |
| 11.450 | 2.1720 |
| 11.520 | 2.1300 |
| 11.590 | 2.1300 |
| 11.660 | 2.1300 |
| 11.730 | 2.0540 |
| 11.800 | 2.0540 |
| 11.870 | 2.0290 |
| 11.940 | 2.0290 |
| 12.010 | 2.0290 |
| 12.080 | 2.0290 |
| 12.150 | 2.0290 |
| 12.220 | 2.0030 |
| 12.290 | 2.0030 |
| 12.350 | 2.0030 |
| 12.420 | 1.9700 |
| 12.490 | 1.9700 |
| 12.560 | 1.9700 |
| 12.630 | 1.9110 |
| 12.700 | 1.9110 |
| 12.770 | 1.9020 |
| 12.840 | 1.9020 |
| 12.910 | 1.9020 |
| 12.980 | 1.8940 |
| 13.050 | 1.8940 |
| 13.120 | 1.8940 |
| 13.190 | 1.8680 |
| 13.260 | 1.8680 |
| 13.330 | 1.8090 |
| 13.400 | 1.8090 |
| 13.470 | 1.8090 |
| 13.540 | 1.7750 |
| 13.600 | 1.7750 |
| 13.670 | 1.7590 |
| 13.740 | 1.7590 |
| 13.810 | 1.7590 |
| 13.880 | 1.7500 |
| 13.950 | 1.7500 |
| 14.020 | 1.7500 |
| 14.090 | 1.7080 |
| 14.160 | 1.7080 |
| 14.230 | 1.6570 |
| 14.300 | 1.6570 |
| 14.370 | 1.6570 |
| 14.440 | 1.6400 |

|        |        |
|--------|--------|
| 14.510 | 1.6400 |
| 14.580 | 1.6320 |
| 14.650 | 1.6320 |
| 14.720 | 1.6320 |
| 14.790 | 1.6070 |
| 14.850 | 1.6070 |
| 14.920 | 1.6070 |
| 14.990 | 1.5640 |
| 15.060 | 1.5640 |
| 15.130 | 1.5140 |
| 15.200 | 1.5140 |
| 15.270 | 1.5140 |
| 15.340 | 1.5050 |
| 15.410 | 1.5050 |
| 15.480 | 1.4970 |
| 15.550 | 1.4970 |
| 15.620 | 1.4970 |
| 15.690 | 1.4710 |
| 15.760 | 1.4710 |
| 15.830 | 1.4710 |
| 15.900 | 1.4120 |
| 15.970 | 1.4120 |
| 16.040 | 1.3950 |
| 16.100 | 1.3950 |
| 16.170 | 1.3950 |
| 16.240 | 1.3950 |
| 16.310 | 1.3950 |
| 16.380 | 1.3950 |
| 16.450 | 1.3790 |
| 16.520 | 1.3790 |
| 16.590 | 1.3360 |
| 16.660 | 1.3360 |
| 16.730 | 1.3360 |
| 16.800 | 1.3030 |
| 16.870 | 1.3030 |
| 16.940 | 1.3030 |
| 17.010 | 1.3030 |
| 17.080 | 1.3030 |
| 17.150 | 1.2940 |
| 17.220 | 1.2940 |
| 17.290 | 1.2940 |
| 17.350 | 1.2860 |
| 17.420 | 1.2860 |
| 17.490 | 1.2520 |
| 17.560 | 1.2520 |
| 17.630 | 1.2520 |
| 17.700 | 1.2350 |
| 17.770 | 1.2350 |
| 17.840 | 1.2350 |
| 17.910 | 1.2350 |
| 17.980 | 1.2350 |
| 18.050 | 1.2270 |
| 18.120 | 1.2270 |
| 18.190 | 1.2270 |
| 18.260 | 1.2180 |
| 18.330 | 1.2180 |
| 18.400 | 1.1930 |
| 18.470 | 1.1930 |
| 18.540 | 1.1930 |
| 18.600 | 1.1760 |

|        |        |
|--------|--------|
| 18.670 | 1.1760 |
| 18.740 | 1.1760 |
| 18.810 | 1.1760 |
| 18.880 | 1.1760 |
| 18.950 | 1.1590 |
| 19.020 | 1.1590 |
| 19.090 | 1.1590 |
| 19.160 | 1.1420 |
| 19.230 | 1.1420 |
| 19.300 | 1.1170 |
| 19.370 | 1.1170 |
| 19.440 | 1.1170 |
| 19.510 | 1.1080 |
| 19.580 | 1.1080 |
| 19.650 | 1.1080 |
| 19.720 | 1.1000 |
| 19.790 | 1.1000 |
| 19.850 | 1.0830 |
| 19.920 | 1.0830 |
| 19.990 | 1.0830 |
| 20.060 | 1.0580 |
| 20.130 | 1.0580 |
| 20.200 | 1.0410 |
| 20.270 | 1.0410 |
| 20.340 | 1.0410 |
| 20.410 | 1.0410 |
| 20.480 | 1.0410 |
| 20.550 | 1.0410 |
| 20.620 | 1.0320 |
| 20.690 | 1.0320 |
| 20.760 | 1.0070 |
| 20.830 | 1.0070 |
| 20.900 | 1.0070 |
| 20.970 | 0.9816 |
| 21.040 | 0.9816 |
| 21.100 | 0.9732 |
| 21.170 | 0.9732 |
| 21.240 | 0.9732 |
| 21.310 | 0.9732 |
| 21.380 | 0.9732 |
| 21.450 | 0.9732 |
| 21.520 | 0.9647 |
| 21.590 | 0.9647 |
| 21.660 | 0.9394 |
| 21.730 | 0.9394 |
| 21.800 | 0.9394 |
| 21.870 | 0.9310 |
| 21.940 | 0.9310 |
| 22.010 | 0.9310 |
| 22.080 | 0.9310 |
| 22.150 | 0.9310 |
| 22.220 | 0.9225 |
| 22.290 | 0.9225 |
| 22.350 | 0.9225 |
| 22.420 | 0.9141 |
| 22.490 | 0.9141 |
| 22.560 | 0.9056 |
| 22.630 | 0.9056 |
| 22.700 | 0.9056 |
| 22.770 | 0.8972 |



|        |        |
|--------|--------|
| 22.840 | 0.8972 |
| 22.910 | 0.8972 |
| 22.980 | 0.8972 |
| 23.050 | 0.8972 |
| 23.120 | 0.8972 |
| 23.190 | 0.8972 |
| 23.260 | 0.8972 |
| 23.330 | 0.8803 |
| 23.400 | 0.8803 |
| 23.470 | 0.8634 |
| 23.540 | 0.8634 |
| 23.600 | 0.8634 |
| 23.670 | 0.8634 |
| 23.740 | 0.8634 |
| 23.810 | 0.8634 |
| 23.880 | 0.8634 |
| 23.950 | 0.8634 |
| 24.020 | 0.8634 |
| 24.090 | 0.8634 |
| 24.160 | 0.8634 |
| 24.230 | 0.8550 |
| 24.300 | 0.8550 |
| 24.370 | 0.8465 |
| 24.440 | 0.8465 |
| 24.510 | 0.8465 |
| 24.580 | 0.8465 |
| 24.650 | 0.8465 |
| 24.720 | 0.8465 |
| 24.780 | 0.8465 |
| 24.850 | 0.8465 |
| 24.920 | 0.8381 |
| 24.990 | 0.8381 |
| 25.060 | 0.8381 |
| 25.130 | 0.8296 |
| 25.200 | 0.8296 |
| 25.270 | 0.8296 |
| 25.340 | 0.8296 |
| 25.410 | 0.8296 |
| 25.480 | 0.8296 |
| 25.550 | 0.8296 |
| 25.620 | 0.8296 |
| 25.690 | 0.8212 |
| 25.760 | 0.8212 |
| 25.830 | 0.8127 |
| 25.900 | 0.8127 |
| 25.970 | 0.8127 |
| 26.030 | 0.8043 |
| 26.100 | 0.8043 |
| 26.170 | 0.8043 |
| 26.240 | 0.8043 |
| 26.310 | 0.8043 |
| 26.380 | 0.8043 |
| 26.450 | 0.8043 |
| 26.520 | 0.8043 |
| 26.590 | 0.7874 |
| 26.660 | 0.7874 |
| 26.730 | 0.7790 |
| 26.800 | 0.7790 |
| 26.870 | 0.7790 |
| 26.940 | 0.7790 |

|        |        |
|--------|--------|
| 27.010 | 0.7790 |
| 27.080 | 0.7790 |
| 27.150 | 0.7790 |
| 27.220 | 0.7790 |
| 27.280 | 0.7705 |
| 27.350 | 0.7705 |
| 27.420 | 0.7705 |
| 27.490 | 0.7705 |
| 27.560 | 0.7705 |
| 27.630 | 0.7621 |
| 27.700 | 0.7621 |
| 27.770 | 0.7621 |
| 27.840 | 0.7621 |
| 27.910 | 0.7621 |
| 27.980 | 0.7621 |
| 28.050 | 0.7621 |
| 28.120 | 0.7621 |
| 28.190 | 0.7536 |
| 28.260 | 0.7536 |
| 28.330 | 0.7536 |
| 28.400 | 0.7536 |
| 28.470 | 0.7536 |
| 28.530 | 0.7452 |
| 28.600 | 0.7452 |
| 28.670 | 0.7452 |
| 28.740 | 0.7452 |
| 28.810 | 0.7452 |
| 28.880 | 0.7452 |
| 28.950 | 0.7452 |
| 29.020 | 0.7452 |
| 29.090 | 0.7367 |
| 29.160 | 0.7367 |
| 29.230 | 0.7367 |
| 29.300 | 0.7283 |
| 29.370 | 0.7283 |
| 29.440 | 0.7283 |
| 29.510 | 0.7198 |
| 29.580 | 0.7198 |
| 29.650 | 0.7198 |
| 29.720 | 0.7198 |
| 29.780 | 0.7198 |
| 29.850 | 0.7198 |
| 29.920 | 0.7198 |
| 29.990 | 0.7114 |
| 30.060 | 0.7114 |
| 30.130 | 0.7114 |
| 30.200 | 0.7030 |
| 30.270 | 0.7030 |
| 30.340 | 0.7030 |
| 30.410 | 0.7030 |
| 30.480 | 0.7030 |
| 30.550 | 0.7030 |
| 30.620 | 0.7030 |
| 30.690 | 0.7030 |
| 30.760 | 0.7030 |
| 30.830 | 0.7030 |
| 30.900 | 0.7030 |
| 30.970 | 0.7030 |
| 31.030 | 0.7030 |
| 31.100 | 0.7030 |

|        |        |
|--------|--------|
| 31.170 | 0.7030 |
| 31.240 | 0.7030 |
| 31.310 | 0.7030 |
| 31.380 | 0.7030 |
| 31.450 | 0.7030 |
| 31.520 | 0.7030 |
| 31.590 | 0.7030 |
| 31.660 | 0.6945 |
| 31.730 | 0.6945 |
| 31.800 | 0.6945 |
| 31.870 | 0.6861 |
| 31.940 | 0.6861 |
| 32.010 | 0.6861 |
| 32.080 | 0.6861 |
| 32.150 | 0.6861 |
| 32.220 | 0.6776 |
| 32.280 | 0.6776 |
| 32.350 | 0.6776 |
| 32.420 | 0.6776 |
| 32.490 | 0.6776 |
| 32.560 | 0.6692 |
| 32.630 | 0.6692 |
| 32.700 | 0.6692 |
| 32.770 | 0.6776 |
| 32.840 | 0.6776 |
| 32.910 | 0.6776 |
| 32.980 | 0.6776 |
| 33.050 | 0.6776 |
| 33.120 | 0.6776 |
| 33.190 | 0.6776 |
| 33.260 | 0.6692 |
| 33.330 | 0.6692 |
| 33.400 | 0.6692 |
| 33.470 | 0.6692 |
| 33.530 | 0.6692 |
| 33.600 | 0.6692 |
| 33.670 | 0.6607 |
| 33.740 | 0.6607 |
| 33.810 | 0.6607 |
| 33.880 | 0.6607 |
| 33.950 | 0.6607 |
| 34.020 | 0.6607 |
| 34.090 | 0.6607 |
| 34.160 | 0.6607 |
| 34.230 | 0.6607 |
| 34.300 | 0.6607 |
| 34.370 | 0.6607 |
| 34.440 | 0.6607 |
| 34.510 | 0.6607 |
| 34.580 | 0.6607 |
| 34.650 | 0.6607 |
| 34.720 | 0.6607 |
| 34.780 | 0.6607 |
| 34.850 | 0.6607 |
| 34.920 | 0.6607 |
| 34.990 | 0.6607 |
| 35.060 | 0.6607 |
| 35.130 | 0.6607 |
| 35.200 | 0.6607 |
| 35.270 | 0.6523 |

|        |        |
|--------|--------|
| 35.340 | 0.6523 |
| 35.410 | 0.6523 |
| 35.480 | 0.6523 |
| 35.550 | 0.6523 |
| 35.620 | 0.6523 |
| 35.690 | 0.6523 |
| 35.760 | 0.6523 |
| 35.830 | 0.6438 |
| 35.900 | 0.6438 |
| 35.970 | 0.6438 |
| 36.030 | 0.6269 |
| 36.100 | 0.6269 |
| 36.170 | 0.6269 |
| 36.240 | 0.6269 |
| 36.310 | 0.6269 |
| 36.380 | 0.6185 |
| 36.450 | 0.6185 |
| 36.520 | 0.6185 |
| 36.590 | 0.6185 |
| 36.660 | 0.6185 |
| 36.730 | 0.6185 |
| 36.800 | 0.6185 |
| 36.870 | 0.6185 |
| 36.940 | 0.6185 |
| 37.010 | 0.6185 |
| 37.080 | 0.6185 |
| 37.150 | 0.6185 |
| 37.210 | 0.6185 |
| 37.280 | 0.6185 |
| 37.350 | 0.6185 |
| 37.420 | 0.6269 |
| 37.490 | 0.6269 |
| 37.560 | 0.6269 |
| 37.630 | 0.6438 |
| 37.700 | 0.6438 |
| 37.770 | 0.6438 |
| 37.840 | 0.6438 |
| 37.910 | 0.6438 |
| 37.980 | 0.6438 |
| 38.050 | 0.6438 |
| 38.120 | 0.6438 |
| 38.190 | 0.6438 |
| 38.260 | 0.6438 |
| 38.330 | 0.6438 |
| 38.400 | 0.6438 |
| 38.460 | 0.6438 |
| 38.530 | 0.6438 |
| 38.600 | 0.6438 |
| 38.670 | 0.6438 |
| 38.740 | 0.6438 |
| 38.810 | 0.6438 |
| 38.880 | 0.6438 |
| 38.950 | 0.6438 |
| 39.020 | 0.6438 |
| 39.090 | 0.6354 |
| 39.160 | 0.6354 |
| 39.230 | 0.6354 |
| 39.300 | 0.6354 |
| 39.370 | 0.6354 |
| 39.440 | 0.6354 |

|        |        |
|--------|--------|
| 39.510 | 0.6354 |
| 39.580 | 0.6354 |
| 39.650 | 0.6354 |
| 39.710 | 0.6354 |
| 39.780 | 0.6354 |
| 39.850 | 0.6354 |
| 39.920 | 0.6354 |
| 39.990 | 0.6354 |
| 40.060 | 0.6354 |
| 40.130 | 0.6354 |
| 40.200 | 0.6354 |
| 40.270 | 0.6354 |
| 40.340 | 0.6354 |
| 40.410 | 0.6354 |
| 40.480 | 0.6354 |
| 40.550 | 0.6269 |
| 40.620 | 0.6269 |
| 40.690 | 0.6269 |
| 40.760 | 0.6269 |
| 40.830 | 0.6269 |
| 40.900 | 0.6269 |
| 40.960 | 0.6269 |
| 41.030 | 0.6269 |
| 41.100 | 0.6269 |
| 41.170 | 0.6269 |
| 41.240 | 0.6185 |
| 41.310 | 0.6185 |
| 41.380 | 0.6185 |
| 41.450 | 0.6185 |
| 41.520 | 0.6185 |
| 41.590 | 0.6185 |
| 41.660 | 0.6185 |
| 41.730 | 0.6185 |
| 41.800 | 0.6185 |
| 41.870 | 0.6185 |
| 41.940 | 0.6185 |
| 42.010 | 0.6185 |
| 42.080 | 0.6185 |
| 42.150 | 0.6185 |
| 42.210 | 0.6185 |
| 42.280 | 0.6185 |
| 42.350 | 0.6185 |
| 42.420 | 0.6185 |
| 42.490 | 0.6185 |
| 42.560 | 0.6185 |
| 42.630 | 0.6185 |
| 42.700 | 0.6185 |
| 42.770 | 0.6185 |
| 42.840 | 0.6185 |
| 42.910 | 0.6185 |
| 42.980 | 0.6185 |
| 43.050 | 0.6185 |
| 43.120 | 0.6185 |
| 43.190 | 0.6185 |
| 43.260 | 0.6185 |
| 43.330 | 0.6185 |
| 43.400 | 0.6185 |
| 43.460 | 0.6185 |
| 43.460 | 0.5847 |
| 43.530 | 0.6185 |

|        |        |
|--------|--------|
| 43.530 | 0.5847 |
| 43.600 | 0.6185 |
| 43.600 | 0.5847 |
| 43.670 | 0.6185 |
| 43.670 | 0.5847 |
| 43.740 | 0.6185 |
| 43.740 | 0.5847 |
| 43.810 | 0.6185 |
| 43.810 | 0.5847 |
| 43.880 | 0.6185 |
| 43.880 | 0.5847 |
| 43.950 | 0.6185 |
| 43.950 | 0.5847 |
| 44.020 | 0.6185 |
| 44.020 | 0.5847 |
| 44.090 | 0.6185 |
| 44.090 | 0.5847 |
| 44.160 | 0.6101 |
| 44.230 | 0.6101 |
| 44.300 | 0.6101 |
| 44.370 | 0.6101 |
| 44.440 | 0.6101 |
| 44.510 | 0.6101 |
| 44.580 | 0.6101 |
| 44.650 | 0.6101 |
| 44.710 | 0.6101 |
| 44.780 | 0.6101 |
| 44.850 | 0.6101 |
| 44.920 | 0.6101 |
| 44.990 | 0.6101 |
| 45.060 | 0.6101 |
| 45.130 | 0.6101 |
| 45.200 | 0.6101 |
| 45.270 | 0.6101 |
| 45.340 | 0.6101 |
| 45.410 | 0.6101 |
| 45.480 | 0.6101 |
| 45.550 | 0.6101 |
| 45.620 | 0.6101 |
| 45.690 | 0.6101 |
| 45.760 | 0.6101 |
| 45.830 | 0.6101 |
| 45.900 | 0.6101 |
| 45.960 | 0.6016 |
| 45.960 | 0.5509 |
| 46.030 | 0.6016 |
| 46.030 | 0.5509 |
| 46.100 | 0.6016 |
| 46.100 | 0.5509 |
| 46.170 | 0.5763 |
| 46.240 | 0.5763 |
| 46.310 | 0.5763 |
| 46.380 | 0.5763 |
| 46.450 | 0.5763 |
| 46.520 | 0.5763 |
| 46.590 | 0.5763 |
| 46.660 | 0.5763 |
| 46.730 | 0.5763 |
| 46.800 | 0.5763 |
| 46.870 | 0.5678 |

|        |        |
|--------|--------|
| 46.940 | 0.5678 |
| 47.010 | 0.5678 |
| 47.080 | 0.5678 |
| 47.150 | 0.5678 |
| 47.210 | 0.5678 |
| 47.280 | 0.5678 |
| 47.350 | 0.5678 |
| 47.420 | 0.5678 |
| 47.490 | 0.5678 |
| 47.560 | 0.5678 |
| 47.630 | 0.5678 |
| 47.700 | 0.5678 |
| 47.770 | 0.5678 |
| 47.840 | 0.5678 |
| 47.910 | 0.5678 |
| 47.980 | 0.5678 |
| 48.050 | 0.5678 |
| 48.120 | 0.5678 |
| 48.190 | 0.5678 |
| 48.260 | 0.5678 |
| 48.330 | 0.5678 |
| 48.400 | 0.5678 |
| 48.460 | 0.5678 |
| 48.530 | 0.5678 |
| 48.600 | 0.5678 |
| 48.670 | 0.5678 |
| 48.740 | 0.5678 |
| 48.810 | 0.5678 |
| 48.880 | 0.5678 |
| 48.950 | 0.5678 |
| 49.020 | 0.5678 |
| 49.090 | 0.5678 |
| 49.160 | 0.5678 |
| 49.230 | 0.5678 |
| 49.300 | 0.5678 |
| 49.370 | 0.5678 |
| 49.440 | 0.5678 |
| 49.510 | 0.5678 |
| 49.580 | 0.5678 |
| 49.640 | 0.5678 |
| 49.710 | 0.5678 |
| 49.780 | 0.5678 |
| 49.850 | 0.5678 |
| 49.920 | 0.5678 |
| 49.990 | 0.5678 |
| 50.060 | 0.5678 |
| 50.130 | 0.5678 |
| 50.200 | 0.5678 |
| 50.270 | 0.5678 |
| 50.340 | 0.5678 |
| 50.410 | 0.5678 |
| 50.480 | 0.5678 |
| 50.550 | 0.5678 |
| 50.620 | 0.5678 |
| 50.690 | 0.5594 |
| 50.760 | 0.5594 |
| 50.830 | 0.5594 |
| 50.890 | 0.5594 |
| 50.960 | 0.5594 |
| 51.030 | 0.5509 |

|        |        |
|--------|--------|
| 51.100 | 0.5509 |
| 51.170 | 0.5509 |
| 51.240 | 0.5509 |
| 51.310 | 0.5509 |
| 51.380 | 0.5509 |
| 51.450 | 0.5509 |
| 51.520 | 0.5509 |
| 51.590 | 0.5509 |
| 51.660 | 0.5509 |
| 51.730 | 0.5509 |
| 51.800 | 0.5509 |
| 51.870 | 0.5509 |
| 51.940 | 0.5509 |
| 52.010 | 0.5509 |
| 52.080 | 0.5509 |
| 52.140 | 0.5509 |
| 52.210 | 0.5509 |
| 52.280 | 0.5509 |
| 52.350 | 0.5594 |
| 52.420 | 0.5594 |
| 52.490 | 0.5594 |
| 52.560 | 0.5594 |
| 52.630 | 0.5594 |
| 52.700 | 0.5678 |
| 52.770 | 0.5678 |
| 52.840 | 0.5678 |
| 52.910 | 0.5678 |
| 52.980 | 0.5678 |
| 53.050 | 0.5678 |
| 53.120 | 0.5678 |
| 53.190 | 0.5678 |
| 53.260 | 0.5763 |
| 53.330 | 0.5763 |
| 53.390 | 0.5678 |
| 53.460 | 0.5678 |
| 53.530 | 0.5678 |
| 53.600 | 0.5678 |
| 53.670 | 0.5678 |
| 53.740 | 0.5678 |
| 53.810 | 0.5678 |
| 53.880 | 0.5678 |
| 53.950 | 0.5678 |
| 54.020 | 0.5678 |
| 54.090 | 0.5678 |
| 54.160 | 0.5678 |
| 54.230 | 0.5678 |
| 54.300 | 0.5678 |
| 54.370 | 0.5678 |
| 54.440 | 0.5678 |
| 54.510 | 0.5594 |
| 54.580 | 0.5594 |
| 54.640 | 0.5594 |
| 54.710 | 0.5594 |
| 54.780 | 0.5594 |
| 54.850 | 0.5594 |
| 54.920 | 0.5594 |
| 54.990 | 0.5594 |
| 55.060 | 0.5594 |
| 55.130 | 0.5594 |
| 55.200 | 0.5509 |



|        |        |
|--------|--------|
| 55.270 | 0.5509 |
| 55.340 | 0.5509 |
| 55.410 | 0.5509 |
| 55.480 | 0.5509 |
| 55.550 | 0.5509 |
| 55.620 | 0.5594 |
| 55.690 | 0.5594 |
| 55.760 | 0.5509 |
| 55.830 | 0.5509 |
| 55.890 | 0.5509 |
| 55.960 | 0.5509 |
| 56.030 | 0.5509 |
| 56.100 | 0.5425 |
| 56.170 | 0.5425 |
| 56.240 | 0.5425 |
| 56.310 | 0.5425 |
| 56.380 | 0.5425 |
| 56.450 | 0.5425 |
| 56.520 | 0.5425 |
| 56.590 | 0.5425 |
| 56.660 | 0.5425 |
| 56.730 | 0.5425 |
| 56.800 | 0.5425 |
| 56.870 | 0.5341 |
| 56.940 | 0.5341 |
| 57.010 | 0.5341 |
| 57.080 | 0.5341 |
| 57.140 | 0.5341 |
| 57.210 | 0.5341 |
| 57.280 | 0.5341 |
| 57.350 | 0.5341 |
| 57.420 | 0.5341 |
| 57.490 | 0.5341 |
| 57.560 | 0.5341 |
| 57.630 | 0.5341 |
| 57.700 | 0.5341 |
| 57.770 | 0.5425 |
| 57.840 | 0.5425 |
| 57.910 | 0.5425 |
| 57.980 | 0.5425 |
| 58.050 | 0.5425 |
| 58.120 | 0.5509 |
| 58.190 | 0.5509 |
| 58.260 | 0.5509 |
| 58.330 | 0.5425 |
| 58.390 | 0.5425 |
| 58.460 | 0.5425 |
| 58.530 | 0.5425 |
| 58.600 | 0.5425 |
| 58.670 | 0.5341 |
| 58.740 | 0.5341 |
| 58.810 | 0.5341 |
| 58.880 | 0.5341 |
| 58.950 | 0.5341 |
| 59.020 | 0.5341 |
| 59.090 | 0.5341 |
| 59.160 | 0.5341 |
| 59.230 | 0.5256 |
| 59.300 | 0.5256 |
| 59.370 | 0.5256 |

|        |        |
|--------|--------|
| 59.440 | 0.5256 |
| 59.510 | 0.5256 |
| 59.580 | 0.5256 |
| 59.640 | 0.5256 |
| 59.710 | 0.5256 |
| 59.780 | 0.5341 |
| 59.850 | 0.5341 |
| 59.920 | 0.5341 |
| 59.990 | 0.5341 |
| 60.060 | 0.5341 |
| 60.130 | 0.5256 |
| 60.200 | 0.5256 |
| 60.270 | 0.5256 |
| 60.340 | 0.5256 |
| 60.410 | 0.5256 |
| 60.480 | 0.5256 |
| 60.550 | 0.5256 |
| 60.620 | 0.5256 |
| 60.690 | 0.5256 |
| 60.760 | 0.5256 |
| 60.830 | 0.5256 |
| 60.890 | 0.5256 |
| 60.960 | 0.5256 |
| 61.030 | 0.5256 |
| 61.100 | 0.5256 |
| 61.170 | 0.5256 |
| 61.240 | 0.5256 |
| 61.310 | 0.5256 |
| 61.380 | 0.5341 |
| 61.450 | 0.5341 |
| 61.520 | 0.5341 |
| 61.590 | 0.5341 |
| 61.660 | 0.5341 |
| 61.730 | 0.5256 |
| 61.800 | 0.5256 |

|       |        |
|-------|--------|
| 3.258 | 0.3638 |
| 3.328 | 0.3638 |
| 3.397 | 0.3806 |
| 3.466 | 0.3806 |
| 3.536 | 0.4228 |
| 3.605 | 0.4228 |
| 3.675 | 0.4228 |
| 3.744 | 0.4396 |
| 3.814 | 0.4396 |
| 3.883 | 0.4733 |
| 3.953 | 0.4733 |
| 4.022 | 0.4733 |
| 4.091 | 0.5238 |
| 4.161 | 0.5238 |
| 4.230 | 0.5238 |
| 4.300 | 0.6418 |
| 4.369 | 0.6418 |
| 4.439 | 0.7344 |
| 4.508 | 0.7344 |
| 4.578 | 0.7344 |
| 4.647 | 0.7597 |
| 4.716 | 0.7597 |
| 4.786 | 0.8524 |
| 4.855 | 0.8524 |
| 4.925 | 0.8524 |
| 4.994 | 0.8860 |
| 5.064 | 0.8860 |
| 5.133 | 0.8860 |
| 5.202 | 0.9871 |
| 5.272 | 0.9871 |
| 5.341 | 1.0380 |
| 5.400 | 1.0970 |
| 5.411 | 1.0380 |
| 5.467 | 1.1210 |
| 5.480 | 1.0380 |
| 5.533 | 1.1290 |
| 5.550 | 1.1890 |
| 5.619 | 1.1890 |
| 5.689 | 1.2650 |
| 5.758 | 1.2650 |
| 5.827 | 1.2650 |
| 5.897 | 1.3320 |
| 5.966 | 1.3320 |
| 6.036 | 1.3320 |
| 6.105 | 1.4420 |
| 6.133 | 1.5160 |
| 6.175 | 1.4420 |
| 6.200 | 1.5400 |
| 6.244 | 1.4670 |
| 6.267 | 1.5650 |
| 6.267 | 1.5810 |
| 6.267 | 1.5970 |
| 6.314 | 1.4670 |
| 6.383 | 1.4670 |
| 6.452 | 1.6440 |
| 6.522 | 1.6440 |
| 6.591 | 1.6440 |
| 6.661 | 1.7030 |
| 6.730 | 1.7030 |
| 6.800 | 1.7450 |

|        |        |
|--------|--------|
| 6.869  | 1.7450 |
| 6.939  | 1.7450 |
| 7.008  | 1.7710 |
| 7.077  | 1.7710 |
| 7.147  | 1.7870 |
| 7.216  | 1.7870 |
| 7.267  | 1.8230 |
| 7.267  | 1.8470 |
| 7.267  | 1.8710 |
| 7.286  | 1.7870 |
| 7.355  | 1.9140 |
| 7.425  | 1.9140 |
| 7.494  | 1.9140 |
| 7.563  | 1.9220 |
| 7.633  | 1.9220 |
| 7.702  | 1.9220 |
| 7.772  | 1.9220 |
| 7.841  | 1.9220 |
| 7.911  | 1.9220 |
| 7.980  | 1.9220 |
| 8.050  | 1.9390 |
| 8.119  | 1.9390 |
| 8.188  | 1.9390 |
| 8.258  | 1.9730 |
| 8.327  | 1.9730 |
| 8.397  | 1.9730 |
| 8.466  | 1.9730 |
| 8.536  | 1.9730 |
| 8.605  | 1.9730 |
| 8.675  | 1.9730 |
| 8.744  | 1.9730 |
| 8.813  | 1.9730 |
| 8.883  | 1.9730 |
| 8.952  | 1.9900 |
| 9.022  | 1.9900 |
| 9.091  | 1.9900 |
| 9.161  | 1.9980 |
| 9.230  | 1.9980 |
| 9.300  | 1.9980 |
| 9.369  | 2.0060 |
| 9.438  | 2.0060 |
| 9.508  | 2.0060 |
| 9.577  | 2.0060 |
| 9.647  | 2.0060 |
| 9.716  | 1.9900 |
| 9.786  | 1.9900 |
| 9.855  | 1.9900 |
| 9.924  | 1.9640 |
| 9.994  | 1.9640 |
| 10.060 | 1.9470 |
| 10.130 | 1.9470 |
| 10.200 | 1.9470 |
| 10.270 | 1.8800 |
| 10.340 | 1.8800 |
| 10.410 | 1.8720 |
| 10.480 | 1.8720 |
| 10.550 | 1.8720 |
| 10.620 | 1.8210 |
| 10.690 | 1.8210 |
| 10.760 | 1.8210 |

|        |        |
|--------|--------|
| 10.800 | 1.7500 |
| 10.930 | 1.7340 |
| 10.970 | 1.6610 |
| 11.040 | 1.6610 |
| 11.110 | 1.6610 |
| 11.170 | 1.6270 |
| 11.240 | 1.6270 |
| 11.310 | 1.6190 |
| 11.380 | 1.6190 |
| 11.450 | 1.6190 |
| 11.730 | 1.5080 |
| 11.870 | 1.4920 |
| 11.870 | 1.4170 |
| 11.940 | 1.4170 |
| 12.010 | 1.4170 |
| 12.080 | 1.4170 |
| 12.150 | 1.4170 |
| 12.220 | 1.3830 |
| 12.290 | 1.3830 |
| 12.350 | 1.3830 |
| 12.630 | 1.3070 |
| 12.700 | 1.3070 |
| 12.770 | 1.2990 |
| 12.840 | 1.2990 |
| 12.910 | 1.2990 |
| 12.980 | 1.2900 |
| 13.050 | 1.2900 |
| 13.120 | 1.2900 |
| 13.190 | 1.2650 |
| 13.260 | 1.2650 |
| 13.540 | 1.2150 |
| 13.600 | 1.2150 |
| 13.670 | 1.2060 |
| 13.740 | 1.2060 |
| 13.810 | 1.2060 |
| 13.880 | 1.1980 |
| 13.950 | 1.1980 |
| 14.020 | 1.1980 |
| 14.440 | 1.1130 |
| 14.510 | 1.1130 |
| 14.580 | 1.1050 |
| 14.650 | 1.1050 |
| 14.720 | 1.1050 |
| 14.790 | 1.0800 |
| 14.850 | 1.0800 |
| 14.920 | 1.0800 |
| 15.130 | 1.0120 |
| 15.200 | 1.0120 |
| 15.270 | 1.0120 |
| 15.340 | 0.9871 |
| 15.410 | 0.9871 |
| 15.480 | 0.9871 |
| 15.550 | 0.9871 |
| 15.620 | 0.9871 |
| 15.730 | 0.9274 |
| 16.040 | 0.8860 |
| 16.100 | 0.8860 |
| 16.170 | 0.8860 |
| 16.240 | 0.8776 |
| 16.310 | 0.8776 |

|        |        |
|--------|--------|
| 16.380 | 0.8776 |
| 16.450 | 0.8608 |
| 16.520 | 0.8608 |
| 16.590 | 0.8355 |
| 16.660 | 0.8355 |
| 16.730 | 0.8355 |
| 16.800 | 0.8355 |
| 16.870 | 0.8355 |
| 16.940 | 0.8355 |
| 17.010 | 0.8355 |
| 17.080 | 0.8355 |
| 17.150 | 0.8355 |
| 17.220 | 0.8355 |
| 17.290 | 0.8355 |
| 17.350 | 0.8355 |
| 17.420 | 0.8355 |
| 17.490 | 0.8355 |
| 17.560 | 0.8355 |
| 17.630 | 0.8355 |
| 17.700 | 0.8355 |
| 17.770 | 0.8355 |
| 17.840 | 0.8355 |
| 17.910 | 0.8355 |
| 17.980 | 0.8355 |
| 18.050 | 0.8355 |
| 18.120 | 0.8355 |
| 18.190 | 0.8355 |
| 18.260 | 0.8271 |
| 18.330 | 0.8271 |
| 18.400 | 0.8187 |
| 18.470 | 0.8187 |
| 18.540 | 0.8187 |
| 18.600 | 0.8018 |
| 18.670 | 0.8018 |
| 18.740 | 0.7934 |
| 18.810 | 0.7934 |
| 18.880 | 0.7934 |
| 18.950 | 0.7765 |
| 19.020 | 0.7765 |
| 19.090 | 0.7765 |
| 19.300 | 0.7260 |
| 19.370 | 0.7260 |
| 19.440 | 0.7260 |
| 19.510 | 0.7176 |
| 19.580 | 0.7176 |
| 19.650 | 0.7176 |
| 19.720 | 0.7176 |
| 19.790 | 0.7176 |
| 19.850 | 0.6839 |
| 19.920 | 0.6839 |
| 19.990 | 0.6839 |
| 20.200 | 0.6670 |
| 20.270 | 0.6670 |
| 20.340 | 0.6670 |
| 20.410 | 0.6670 |
| 20.480 | 0.6670 |
| 20.550 | 0.6670 |
| 20.620 | 0.6670 |
| 20.690 | 0.6670 |
| 20.760 | 0.6755 |

|        |        |
|--------|--------|
| 20.830 | 0.6755 |
| 20.900 | 0.6755 |
| 20.970 | 0.6839 |
| 21.040 | 0.6839 |
| 21.100 | 0.6839 |
| 21.170 | 0.6839 |
| 21.240 | 0.6839 |
| 21.310 | 0.6839 |
| 21.380 | 0.6839 |
| 21.450 | 0.6839 |
| 21.520 | 0.6839 |
| 21.590 | 0.6839 |
| 21.660 | 0.6839 |
| 21.730 | 0.6839 |
| 21.800 | 0.6839 |
| 21.870 | 0.6755 |
| 21.940 | 0.6755 |
| 22.010 | 0.6839 |
| 22.080 | 0.6839 |
| 22.150 | 0.6839 |
| 22.220 | 0.6755 |
| 22.290 | 0.6755 |
| 22.350 | 0.6755 |
| 22.770 | 0.6586 |
| 22.840 | 0.6586 |
| 22.910 | 0.6586 |
| 22.980 | 0.6586 |
| 23.050 | 0.6586 |
| 23.120 | 0.6502 |
| 23.190 | 0.6502 |
| 23.260 | 0.6502 |
| 23.330 | 0.6418 |
| 23.400 | 0.6418 |
| 23.470 | 0.6333 |
| 23.540 | 0.6333 |
| 23.600 | 0.6333 |
| 23.670 | 0.6333 |
| 23.740 | 0.6333 |
| 23.810 | 0.6333 |
| 23.880 | 0.6333 |
| 23.950 | 0.6333 |
| 24.020 | 0.6333 |
| 24.090 | 0.6333 |
| 24.160 | 0.6333 |
| 24.230 | 0.6249 |
| 24.300 | 0.6249 |
| 24.370 | 0.6249 |
| 24.440 | 0.6249 |
| 24.510 | 0.6249 |
| 24.580 | 0.6249 |
| 24.650 | 0.6249 |
| 24.720 | 0.6249 |
| 24.780 | 0.6249 |
| 24.850 | 0.6249 |
| 24.920 | 0.6249 |
| 24.990 | 0.6249 |
| 25.060 | 0.6249 |
| 25.130 | 0.6249 |
| 25.200 | 0.6249 |
| 25.270 | 0.6249 |

|        |        |
|--------|--------|
| 25.340 | 0.6249 |
| 25.410 | 0.6249 |
| 25.480 | 0.6249 |
| 25.550 | 0.6249 |
| 25.620 | 0.6249 |
| 25.690 | 0.6249 |
| 25.760 | 0.6249 |
| 26.030 | 0.6081 |
| 26.100 | 0.6081 |
| 26.170 | 0.6081 |
| 26.240 | 0.6081 |
| 26.310 | 0.6081 |
| 26.380 | 0.6081 |
| 26.450 | 0.6081 |
| 26.520 | 0.6081 |
| 26.730 | 0.5912 |
| 26.800 | 0.5912 |
| 26.870 | 0.5912 |
| 26.940 | 0.5828 |
| 27.010 | 0.5828 |
| 27.080 | 0.5828 |
| 27.150 | 0.5828 |
| 27.220 | 0.5828 |
| 27.280 | 0.5828 |
| 27.350 | 0.5828 |
| 27.420 | 0.5828 |
| 27.490 | 0.5744 |
| 27.560 | 0.5744 |
| 27.630 | 0.5660 |
| 27.700 | 0.5660 |
| 27.770 | 0.5660 |
| 27.840 | 0.5660 |
| 27.910 | 0.5660 |
| 27.980 | 0.5660 |
| 28.050 | 0.5660 |
| 28.120 | 0.5660 |
| 28.190 | 0.5660 |
| 28.260 | 0.5660 |
| 28.330 | 0.5660 |
| 28.400 | 0.5744 |
| 28.470 | 0.5744 |
| 28.530 | 0.5744 |
| 28.600 | 0.5744 |
| 28.670 | 0.5744 |
| 28.740 | 0.5828 |
| 28.810 | 0.5828 |
| 28.880 | 0.5828 |
| 28.950 | 0.5828 |
| 29.020 | 0.5828 |
| 29.090 | 0.5828 |
| 29.160 | 0.5828 |
| 29.230 | 0.5828 |
| 29.300 | 0.5828 |
| 29.370 | 0.5828 |
| 29.440 | 0.5828 |
| 29.510 | 0.5912 |
| 29.580 | 0.5912 |
| 29.650 | 0.5912 |
| 29.720 | 0.5912 |
| 29.780 | 0.5912 |



|        |        |
|--------|--------|
| 29.850 | 0.5912 |
| 29.920 | 0.5912 |
| 30.200 | 0.5660 |
| 30.270 | 0.5660 |
| 30.340 | 0.5660 |
| 30.410 | 0.5575 |
| 30.480 | 0.5575 |
| 30.550 | 0.5575 |
| 30.620 | 0.5575 |
| 30.690 | 0.5575 |
| 30.760 | 0.5575 |
| 30.830 | 0.5575 |
| 30.900 | 0.5575 |
| 30.970 | 0.5575 |
| 31.030 | 0.5575 |
| 31.100 | 0.5660 |
| 31.170 | 0.5660 |
| 31.240 | 0.5660 |
| 31.310 | 0.5660 |
| 31.380 | 0.5660 |
| 31.450 | 0.5660 |
| 31.520 | 0.5660 |
| 31.590 | 0.5660 |
| 31.660 | 0.5660 |
| 31.730 | 0.5660 |
| 31.800 | 0.5660 |
| 31.870 | 0.5660 |
| 31.940 | 0.5660 |
| 32.010 | 0.5660 |
| 32.080 | 0.5660 |
| 32.150 | 0.5660 |
| 32.220 | 0.5660 |
| 32.280 | 0.5660 |
| 32.350 | 0.5660 |
| 32.420 | 0.5660 |
| 32.490 | 0.5660 |
| 32.560 | 0.5660 |
| 32.630 | 0.5660 |
| 32.700 | 0.5660 |
| 32.770 | 0.5660 |
| 32.840 | 0.5660 |
| 32.910 | 0.5660 |
| 32.980 | 0.5660 |
| 33.050 | 0.5660 |
| 33.120 | 0.5660 |
| 33.190 | 0.5660 |
| 33.260 | 0.5660 |
| 33.330 | 0.5660 |
| 33.400 | 0.5660 |
| 33.470 | 0.5660 |
| 33.530 | 0.5660 |
| 33.600 | 0.5660 |
| 33.670 | 0.5660 |
| 33.740 | 0.5660 |
| 33.810 | 0.5660 |
| 33.880 | 0.5660 |
| 33.950 | 0.5660 |
| 34.020 | 0.5828 |
| 34.090 | 0.5828 |
| 34.160 | 0.5828 |

|        |        |
|--------|--------|
| 34.230 | 0.5828 |
| 34.300 | 0.5828 |
| 34.370 | 0.5912 |
| 34.440 | 0.5912 |
| 34.510 | 0.5912 |
| 34.580 | 0.5912 |
| 34.650 | 0.5912 |
| 34.720 | 0.5996 |
| 34.780 | 0.5996 |
| 34.850 | 0.5996 |
| 34.920 | 0.5912 |
| 34.990 | 0.5912 |
| 35.060 | 0.5912 |
| 35.130 | 0.5828 |
| 35.200 | 0.5828 |
| 35.270 | 0.5744 |
| 35.340 | 0.5744 |
| 35.410 | 0.5744 |
| 35.480 | 0.5744 |
| 35.550 | 0.5744 |
| 35.620 | 0.5744 |
| 35.690 | 0.5744 |
| 35.760 | 0.5744 |
| 35.830 | 0.5744 |
| 35.900 | 0.5744 |
| 35.970 | 0.5744 |
| 36.030 | 0.5828 |
| 36.100 | 0.5828 |
| 36.170 | 0.5912 |
| 36.240 | 0.5912 |
| 36.310 | 0.5912 |
| 36.380 | 0.5912 |
| 36.450 | 0.5912 |
| 36.520 | 0.5912 |
| 36.590 | 0.5912 |
| 36.660 | 0.5912 |
| 36.730 | 0.5828 |
| 36.800 | 0.5828 |
| 36.870 | 0.5828 |
| 36.940 | 0.5828 |
| 37.010 | 0.5828 |
| 37.080 | 0.5744 |
| 37.150 | 0.5744 |
| 37.210 | 0.5744 |
| 37.280 | 0.5660 |
| 37.350 | 0.5660 |
| 37.420 | 0.5407 |
| 37.490 | 0.5407 |
| 37.560 | 0.5407 |
| 37.630 | 0.5407 |
| 37.700 | 0.5407 |
| 37.770 | 0.5407 |
| 37.840 | 0.5407 |
| 37.910 | 0.5407 |
| 37.980 | 0.5407 |
| 38.050 | 0.5407 |
| 38.120 | 0.5407 |
| 38.190 | 0.5323 |
| 38.260 | 0.5323 |
| 38.330 | 0.5323 |

|        |        |
|--------|--------|
| 38.400 | 0.5323 |
| 38.460 | 0.5323 |
| 38.530 | 0.5323 |
| 38.600 | 0.5323 |
| 38.670 | 0.5323 |
| 38.740 | 0.5323 |
| 38.810 | 0.5323 |
| 38.880 | 0.5323 |
| 38.950 | 0.5323 |
| 39.020 | 0.5323 |
| 39.090 | 0.5323 |
| 39.160 | 0.5323 |
| 39.230 | 0.5323 |
| 39.300 | 0.5238 |
| 39.370 | 0.5238 |
| 39.440 | 0.5154 |
| 39.510 | 0.5154 |
| 39.580 | 0.5154 |
| 39.650 | 0.5154 |
| 39.710 | 0.5154 |
| 39.780 | 0.5154 |
| 39.850 | 0.5154 |
| 39.920 | 0.5154 |
| 39.990 | 0.5238 |
| 40.060 | 0.5238 |
| 40.130 | 0.5238 |
| 40.200 | 0.5407 |
| 40.270 | 0.5407 |
| 40.340 | 0.5491 |
| 40.410 | 0.5491 |
| 40.480 | 0.5491 |
| 40.550 | 0.5491 |
| 40.620 | 0.5491 |
| 40.690 | 0.5491 |
| 40.760 | 0.5491 |
| 40.830 | 0.5491 |
| 40.900 | 0.5491 |
| 40.960 | 0.5491 |
| 41.030 | 0.5491 |
| 41.100 | 0.5407 |
| 41.170 | 0.5407 |
| 41.240 | 0.5407 |
| 41.310 | 0.5407 |
| 41.380 | 0.5407 |
| 41.450 | 0.5407 |
| 41.520 | 0.5407 |
| 41.590 | 0.5407 |
| 41.660 | 0.5407 |
| 41.730 | 0.5407 |
| 41.800 | 0.5407 |
| 41.870 | 0.5407 |
| 41.940 | 0.5407 |
| 42.010 | 0.5407 |
| 42.080 | 0.5407 |
| 42.150 | 0.5407 |
| 42.210 | 0.5407 |
| 42.280 | 0.5407 |
| 42.350 | 0.5407 |
| 42.420 | 0.5407 |
| 42.490 | 0.5407 |

|        |        |
|--------|--------|
| 42.700 | 0.5575 |
| 42.770 | 0.5575 |
| 42.840 | 0.5575 |
| 42.910 | 0.5660 |
| 42.980 | 0.5660 |
| 43.050 | 0.5660 |
| 43.120 | 0.5660 |
| 43.190 | 0.5660 |
| 43.260 | 0.5660 |
| 43.330 | 0.5660 |
| 43.400 | 0.5660 |
| 43.460 | 0.5660 |
| 43.530 | 0.5660 |
| 43.600 | 0.5660 |
| 43.670 | 0.5660 |
| 43.740 | 0.5660 |
| 43.810 | 0.5660 |
| 43.880 | 0.5660 |
| 43.950 | 0.5744 |
| 44.020 | 0.5744 |
| 44.090 | 0.5744 |
| 44.160 | 0.5744 |
| 44.230 | 0.5744 |
| 44.300 | 0.5744 |
| 44.370 | 0.5828 |
| 44.440 | 0.5828 |
| 44.510 | 0.5828 |
| 44.580 | 0.5828 |
| 44.650 | 0.5828 |
| 44.710 | 0.5828 |
| 44.780 | 0.5828 |
| 44.850 | 0.5828 |
| 44.920 | 0.5912 |
| 44.920 | 0.5660 |
| 44.990 | 0.5912 |
| 44.990 | 0.5660 |
| 45.270 | 0.5491 |
| 45.340 | 0.5491 |
| 45.410 | 0.5323 |
| 45.480 | 0.5323 |
| 45.550 | 0.5323 |
| 45.620 | 0.5323 |
| 45.690 | 0.5323 |
| 45.760 | 0.5323 |
| 45.830 | 0.5323 |
| 45.900 | 0.5323 |
| 45.960 | 0.5407 |
| 46.030 | 0.5407 |
| 46.100 | 0.5407 |
| 46.170 | 0.6081 |
| 46.170 | 0.5491 |
| 46.240 | 0.6081 |
| 46.240 | 0.5491 |
| 46.310 | 0.5660 |
| 46.380 | 0.5660 |
| 46.450 | 0.5660 |
| 46.520 | 0.5660 |
| 46.590 | 0.5660 |
| 46.660 | 0.5660 |
| 46.730 | 0.5744 |

|        |        |
|--------|--------|
| 46.800 | 0.5744 |
| 46.870 | 0.5660 |
| 46.940 | 0.5660 |
| 47.010 | 0.5660 |
| 47.080 | 0.5744 |
| 47.150 | 0.5744 |
| 47.210 | 0.5744 |
| 47.280 | 0.5744 |
| 47.350 | 0.5744 |
| 47.420 | 0.5744 |
| 47.490 | 0.5744 |
| 47.560 | 0.5744 |
| 47.630 | 0.5744 |
| 47.700 | 0.5744 |
| 47.770 | 0.5744 |
| 47.840 | 0.5744 |
| 47.910 | 0.5744 |
| 47.980 | 0.5744 |
| 48.050 | 0.5744 |
| 48.120 | 0.5744 |
| 48.190 | 0.5744 |
| 48.260 | 0.5744 |
| 48.330 | 0.5744 |
| 48.400 | 0.5744 |
| 48.460 | 0.5744 |
| 48.530 | 0.5660 |
| 48.600 | 0.5660 |
| 48.670 | 0.5660 |
| 48.740 | 0.5660 |
| 48.810 | 0.5660 |
| 48.880 | 0.5660 |
| 48.950 | 0.5660 |
| 49.020 | 0.5660 |
| 49.090 | 0.5660 |
| 49.160 | 0.5660 |
| 49.230 | 0.5744 |
| 49.230 | 0.5491 |
| 49.300 | 0.5744 |
| 49.300 | 0.5491 |
| 49.370 | 0.5744 |
| 49.370 | 0.5491 |
| 49.440 | 0.5744 |
| 49.440 | 0.5491 |
| 49.510 | 0.5744 |
| 49.510 | 0.5491 |
| 49.580 | 0.5744 |
| 49.580 | 0.5238 |
| 49.640 | 0.5744 |
| 49.640 | 0.5238 |
| 49.710 | 0.5744 |
| 49.710 | 0.5238 |
| 49.780 | 0.5744 |
| 49.780 | 0.5238 |
| 49.850 | 0.5744 |
| 49.850 | 0.5238 |
| 49.920 | 0.5744 |
| 49.920 | 0.5238 |
| 49.990 | 0.5744 |
| 49.990 | 0.5238 |
| 50.060 | 0.5744 |

|        |        |
|--------|--------|
| 50.060 | 0.5238 |
| 50.130 | 0.5744 |
| 50.130 | 0.5407 |
| 50.200 | 0.5744 |
| 50.200 | 0.5407 |
| 50.270 | 0.5744 |
| 50.270 | 0.5407 |
| 50.340 | 0.5575 |
| 50.410 | 0.5575 |
| 50.480 | 0.5575 |
| 50.550 | 0.5575 |
| 50.620 | 0.5575 |
| 50.690 | 0.5575 |
| 50.760 | 0.5575 |
| 50.830 | 0.5575 |
| 50.890 | 0.5575 |
| 50.960 | 0.5575 |
| 51.030 | 0.5491 |
| 51.100 | 0.5491 |
| 51.170 | 0.5491 |
| 51.240 | 0.5575 |
| 51.310 | 0.5575 |
| 51.380 | 0.5575 |
| 51.450 | 0.5575 |
| 51.520 | 0.5575 |
| 51.590 | 0.5575 |
| 51.660 | 0.5575 |
| 51.730 | 0.5575 |
| 51.800 | 0.5575 |
| 51.870 | 0.5575 |
| 51.940 | 0.5660 |
| 52.010 | 0.5660 |
| 52.080 | 0.5660 |
| 52.140 | 0.5660 |
| 52.210 | 0.5660 |
| 52.280 | 0.5660 |
| 52.350 | 0.5660 |
| 52.420 | 0.5660 |
| 52.490 | 0.5660 |
| 52.560 | 0.5660 |
| 52.630 | 0.5660 |
| 52.700 | 0.5660 |
| 52.770 | 0.5660 |
| 52.840 | 0.5744 |
| 52.910 | 0.5744 |
| 52.980 | 0.5744 |
| 53.050 | 0.5744 |
| 53.120 | 0.5744 |
| 53.190 | 0.5744 |
| 53.260 | 0.5744 |
| 53.330 | 0.5744 |
| 53.390 | 0.5744 |
| 53.460 | 0.5744 |
| 53.530 | 0.5744 |
| 53.600 | 0.5828 |
| 53.670 | 0.5828 |
| 53.740 | 0.5744 |
| 53.810 | 0.5744 |
| 53.880 | 0.5744 |
| 53.950 | 0.5744 |

|        |        |
|--------|--------|
| 54.020 | 0.5744 |
| 54.090 | 0.5744 |
| 54.160 | 0.5744 |
| 54.230 | 0.5744 |
| 54.300 | 0.5744 |
| 54.370 | 0.5744 |
| 54.440 | 0.5744 |
| 54.510 | 0.5660 |
| 54.580 | 0.5660 |
| 54.640 | 0.5660 |
| 54.710 | 0.5660 |
| 54.780 | 0.5660 |
| 54.850 | 0.5660 |
| 54.920 | 0.5660 |
| 54.990 | 0.5660 |
| 55.060 | 0.5575 |
| 55.130 | 0.5575 |
| 55.200 | 0.5575 |
| 55.270 | 0.5575 |
| 55.340 | 0.5575 |
| 55.410 | 0.5575 |
| 55.480 | 0.5575 |
| 55.550 | 0.5575 |
| 55.620 | 0.5575 |
| 55.690 | 0.5575 |
| 55.760 | 0.5575 |
| 55.830 | 0.5575 |
| 55.890 | 0.5575 |
| 55.960 | 0.5575 |
| 56.030 | 0.5575 |
| 56.100 | 0.5575 |
| 56.170 | 0.5575 |
| 56.240 | 0.5575 |
| 56.310 | 0.5491 |
| 56.380 | 0.5491 |
| 56.450 | 0.5491 |
| 56.520 | 0.5491 |
| 56.590 | 0.5491 |
| 56.660 | 0.5491 |
| 56.730 | 0.5491 |
| 56.800 | 0.5491 |
| 56.870 | 0.5407 |
| 56.940 | 0.5407 |
| 57.010 | 0.5407 |
| 57.080 | 0.5407 |
| 57.140 | 0.5407 |
| 57.210 | 0.5407 |
| 57.280 | 0.5407 |
| 57.350 | 0.5407 |
| 57.420 | 0.5407 |
| 57.490 | 0.5407 |
| 57.560 | 0.5407 |
| 57.630 | 0.5407 |
| 57.700 | 0.5407 |
| 57.770 | 0.5491 |
| 57.840 | 0.5491 |
| 57.910 | 0.5491 |
| 57.980 | 0.5491 |
| 58.050 | 0.5491 |
| 58.120 | 0.5491 |

|        |        |
|--------|--------|
| 58.190 | 0.5491 |
| 58.260 | 0.5491 |
| 58.330 | 0.5491 |
| 58.390 | 0.5491 |
| 58.460 | 0.5491 |
| 58.530 | 0.5491 |
| 58.600 | 0.5491 |
| 58.670 | 0.5407 |
| 58.740 | 0.5407 |
| 58.810 | 0.5407 |
| 58.880 | 0.5407 |
| 58.950 | 0.5407 |
| 59.020 | 0.5407 |
| 59.090 | 0.5407 |
| 59.160 | 0.5407 |
| 59.230 | 0.5407 |
| 59.300 | 0.5407 |
| 59.370 | 0.5575 |
| 59.440 | 0.5575 |
| 59.510 | 0.5575 |
| 59.580 | 0.5575 |
| 59.580 | 0.5154 |
| 59.640 | 0.5575 |
| 59.640 | 0.5154 |
| 59.710 | 0.5575 |
| 59.710 | 0.5154 |
| 59.780 | 0.5660 |
| 59.780 | 0.5070 |
| 59.850 | 0.5660 |
| 59.850 | 0.5070 |
| 59.920 | 0.5660 |
| 59.920 | 0.5070 |
| 59.990 | 0.5660 |
| 59.990 | 0.5070 |
| 60.060 | 0.5660 |
| 60.060 | 0.5070 |
| 60.130 | 0.5575 |
| 60.130 | 0.5070 |
| 60.200 | 0.5575 |
| 60.200 | 0.5070 |
| 60.270 | 0.5491 |
| 60.270 | 0.5154 |
| 60.340 | 0.5491 |
| 60.340 | 0.5154 |
| 60.410 | 0.5491 |
| 60.410 | 0.5154 |
| 60.480 | 0.5323 |
| 60.550 | 0.5323 |
| 60.620 | 0.5323 |
| 60.690 | 0.5323 |
| 60.760 | 0.5323 |
| 60.830 | 0.5323 |
| 60.890 | 0.5323 |
| 60.960 | 0.5323 |
| 61.030 | 0.5407 |
| 61.100 | 0.5407 |
| 61.170 | 0.5407 |
| 61.240 | 0.5407 |
| 61.310 | 0.5407 |
| 61.380 | 0.5323 |



|        |        |
|--------|--------|
| 61.450 | 0.5323 |
| 61.520 | 0.5323 |
| 61.590 | 0.5323 |
| 61.660 | 0.5323 |
| 61.730 | 0.5323 |
| 61.800 | 0.5323 |
